# Supplementary material for: Gastric cancer incidence, mortality and burden in adolescents and young adults: a time-trend analysis and comparison among China, South Korea, Japan and the USA
Source: HighWire-hosted journal article supplement (doi:10.1136/bmjopen-2022-061038), 2022-07-01
Supplement: bmjopen-2022-061038supp001_data_supplement.pdf [file bmjopen-2022-061038supp001_data_supplement.pdf]

## Supplementary material

### **Gastric cancer incidence, mortality, and burden in adolescents and young adults: A time-trend analysis and comparison among China, South Korea, Japan and the USA**

Supplementary Table 1. Disability-adjusted life years and its age-standardized rate of gastric cancer in adolescents and young adults, and percentage changes from 1990 to 2019 in China, South Korea, Japan and the USA.

Supplementary Figure 1. Rank changes in disability-adjusted life years attributable to cancers in adolescents and young adults in China, South Korea, Japan and the USA from 1990 to 2019.

Supplementary Figure 2. The temporal trends of the mortality-to-incidence ratio (MIR) for gastric cancer in adolescents and young adults in China, South Korea, Japan and the USA from 1990 to 2019.

This supplementary material has been provided by the authors to give readers additional information about their work.

Supplementary Table 1. Disability-adjusted life years and its age-standardized rate of gastric cancer in adolescents and young adults, and percentage changes from 1990 to 2019 in China, South Korea, Japan and the USA.

| Country | Sex    | DALYs   |         |                      | ASDR   |        |                      |
|---------|--------|---------|---------|----------------------|--------|--------|----------------------|
|         |        | 1990    | 2019    | 1990-2019 change (%) | 1990   | 2019   | 1990-2019 change (%) |
| China   | Both   | 779 909 | 475 977 | -38.97               | 155.81 | 84.68  | -45.65               |
|         | Male   | 416 551 | 308 971 | -25.83               | 160.93 | 107.71 | -49.77               |
|         | Female | 363 358 | 167 005 | -50.04               | 150.31 | 60.78  | -59.56               |
| Korea   | Both   | 71 475  | 13 267  | -81.44               | 355.99 | 66.67  | -81.27               |
|         | Male   | 32 299  | 5 667   | -82.45               | 317.60 | 53.75  | -83.08               |
|         | Female | 39 176  | 7 600   | -80.60               | 395.55 | 81.26  | -79.44               |
| Japan   | Both   | 68 962  | 15 367  | -77.71               | 150.80 | 41.67  | -72.37               |
|         | Male   | 30 060  | 7 399   | -75.39               | 129.57 | 39.53  | -69.49               |
|         | Female | 38 903  | 7 969   | -75.92               | 172.44 | 43.88  | -74.55               |
| USA     | Both   | 22 359  | 19 233  | -13.98               | 20.53  | 16.85  | -17.92               |
|         | Male   | 12 413  | 9 778   | -21.23               | 22.80  | 17.09  | -25.35               |
|         | Female | 9 946   | 9 455   | -4.93                | 18.28  | 16.62  | -9.08                |

Abbreviations: ASDR, age-standardized DALYs rate; DALYs, disability-adjusted life years.

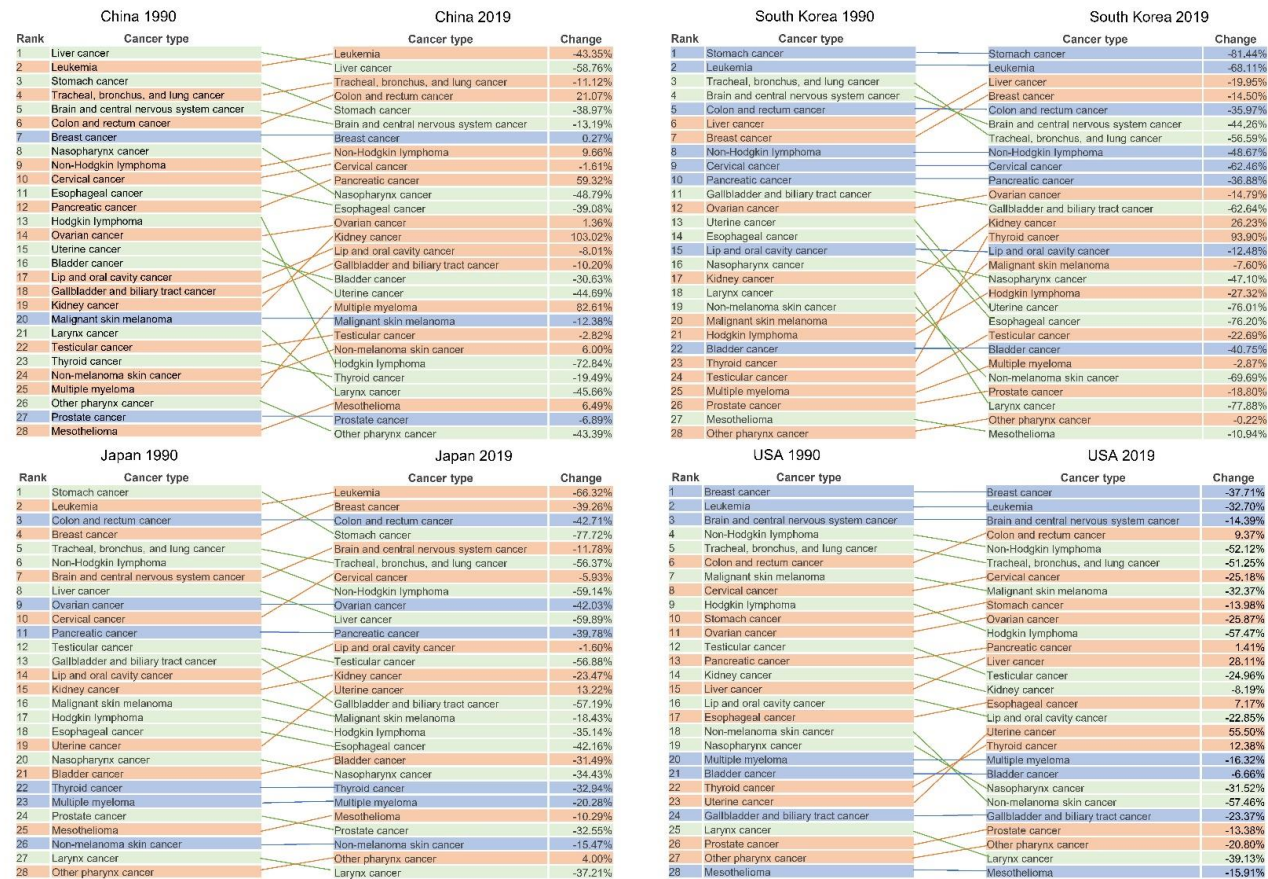

Supplementary Figure 1. Rank changes in disability-adjusted life years attributable to cancers in adolescents and young adults in China, South Korea, Japan and the USA from 1990 to 2019.

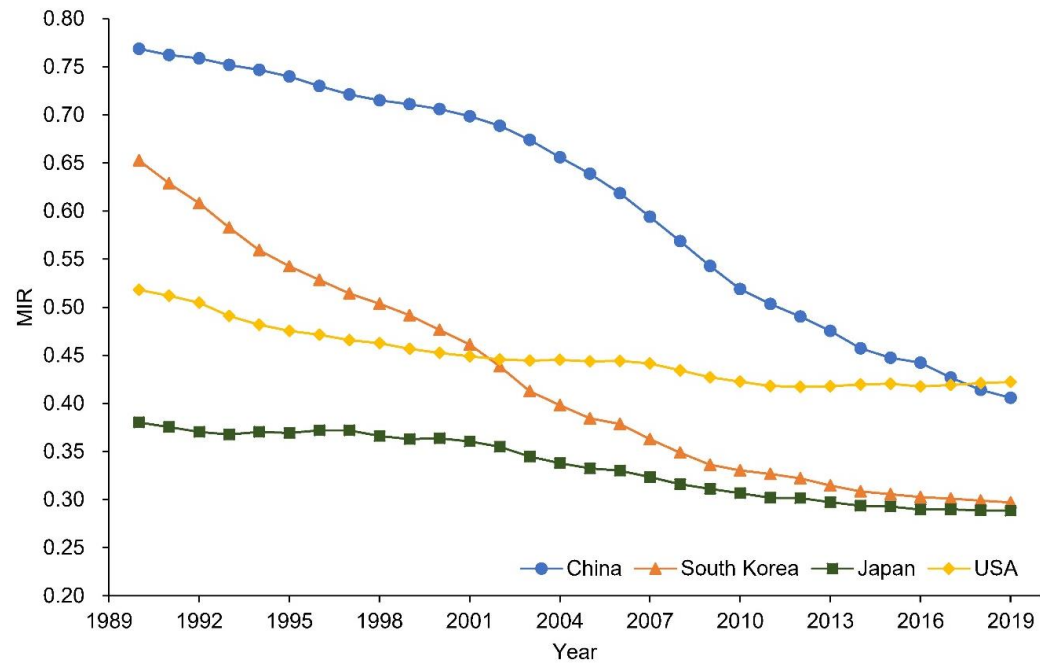

Supplementary Figure 2. The temporal trends of the mortality-to-incidence ratio (MIR) for gastric cancer in adolescents and young adults in China, South Korea, Japan and the USA from 1990 to 2019.
